# Supplementary material for: Turning Berlin green frameworks into cubic crystals for cathodes with high-rate capability
Source: Royal Society of Chemistry journal article supplement (doi:10.1039/d3gc01797d), 2023-01-01
Supplement: d3gc01797d1.pdf [file d3gc01797d1.pdf]

## Electronic Supplementary Information

### Turning Berlin Green Frameworks into Cubic Crystals for Cathodes with High-Rate Capability

Jeong Yeon Heo,<sup>‡a,b</sup> Ju-Hyeon Lee,<sup>‡a,b</sup> Jin-Gyu Bae,<sup>a,b</sup> Min Sung Kim,<sup>a,b</sup> Hyeon Jeong Lee<sup>\*c</sup>  
and Ji Hoon Lee<sup>\*a,b</sup>

<sup>a</sup> School of Materials Science and Engineering, Kyungpook National University, Daegu, 41566, Republic of Korea

<sup>b</sup> KNU Advanced Material Research Institute, Kyungpook National University, Daegu, 41566, Republic of Korea

<sup>c</sup> Department of Materials Science and Engineering, Ulsan National Institute of Science and Technology, Ulsan 44919, Republic of Korea

<sup>‡</sup>: These authors contribute equally.

\*Corresponding authors:

H. J. Lee ([hyeonjeong.lee@unist.ac.kr](mailto:hyeonjeong.lee@unist.ac.kr)), J. H. Lee ([jihoonlee@knu.ac.kr](mailto:jihoonlee@knu.ac.kr))

**Keywords:** Crystal engineering, Morphological transition, Prussian blue analogues, Metal–ligand interaction, X-ray diffraction

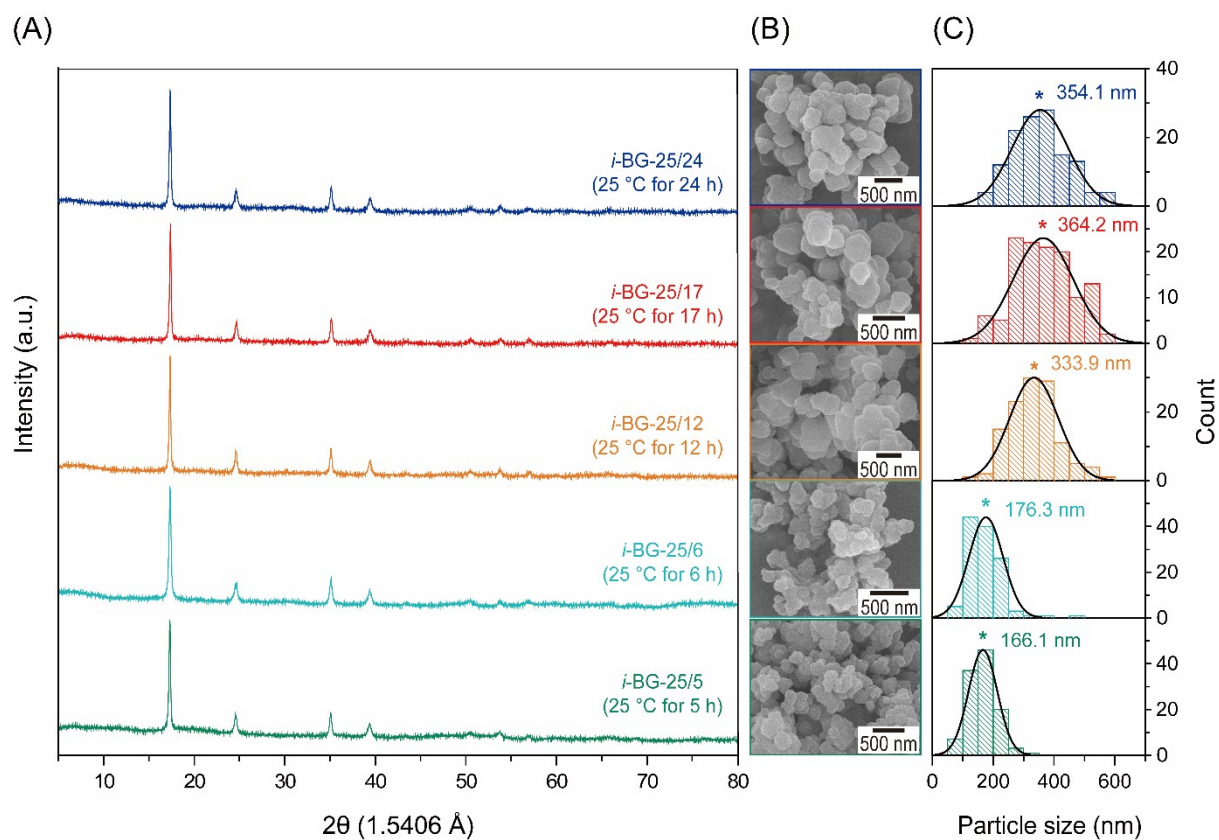

**Fig. S1.** (A) XRD patterns and (B) SEM images of a series of *i*-BG-25/*t* samples. (C) Particle size distribution curves of *i*-BG-25/*t* samples.

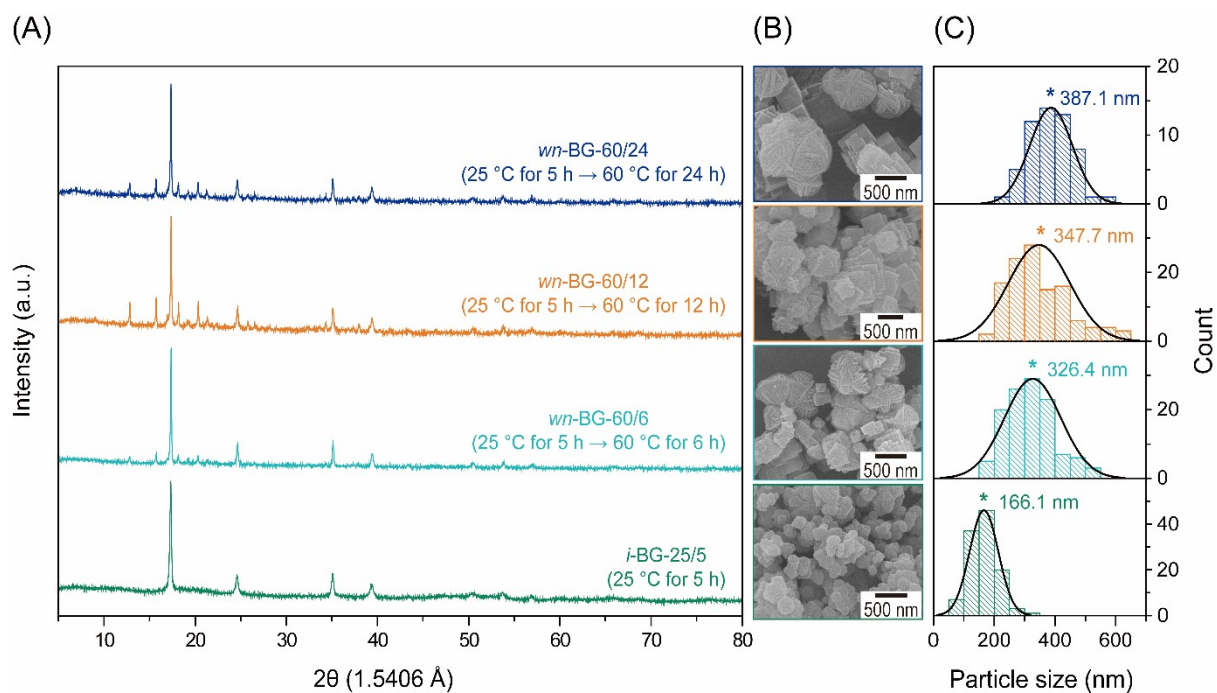

**Fig. S2.** (A) XRD patterns and (B) SEM images of a series of *wn*-BG-60/*t* samples. (C) Particle size distribution curves of *wn*-BG-60/*t* samples.

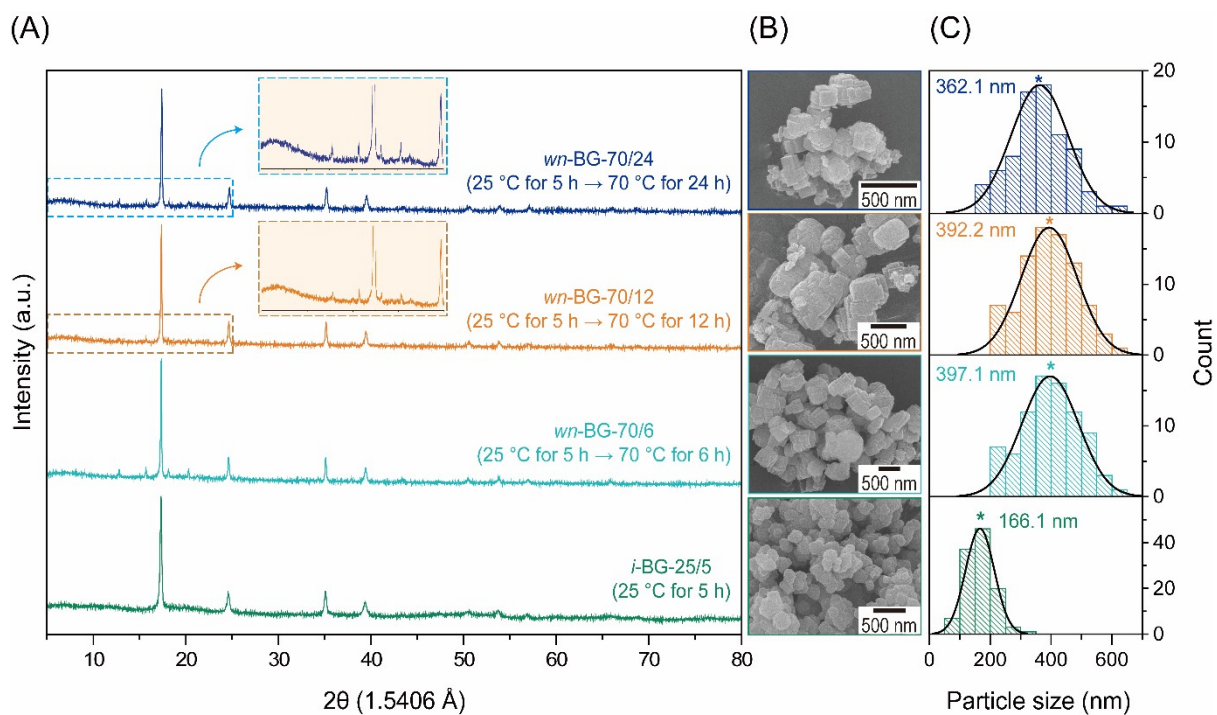

**Fig. S3.** (A) XRD patterns and (B) SEM images of a series of *wn*-BG-70/*t* samples. (C) Particle size distribution curves of *wn*-BG-70/*t* samples.

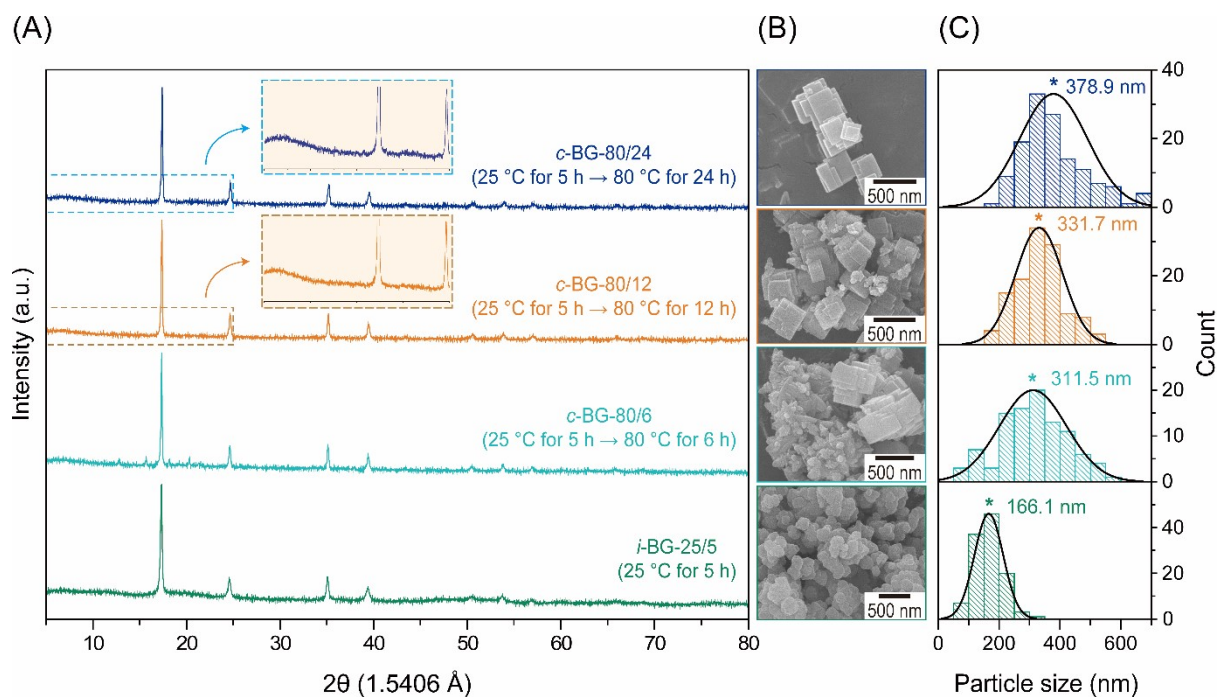

**Fig. S4.** (A) XRD patterns and (B) SEM images of a series of *c*-BG-80/*t* samples. (C) Particle size distribution curves of *c*-BG-80/*t* samples.

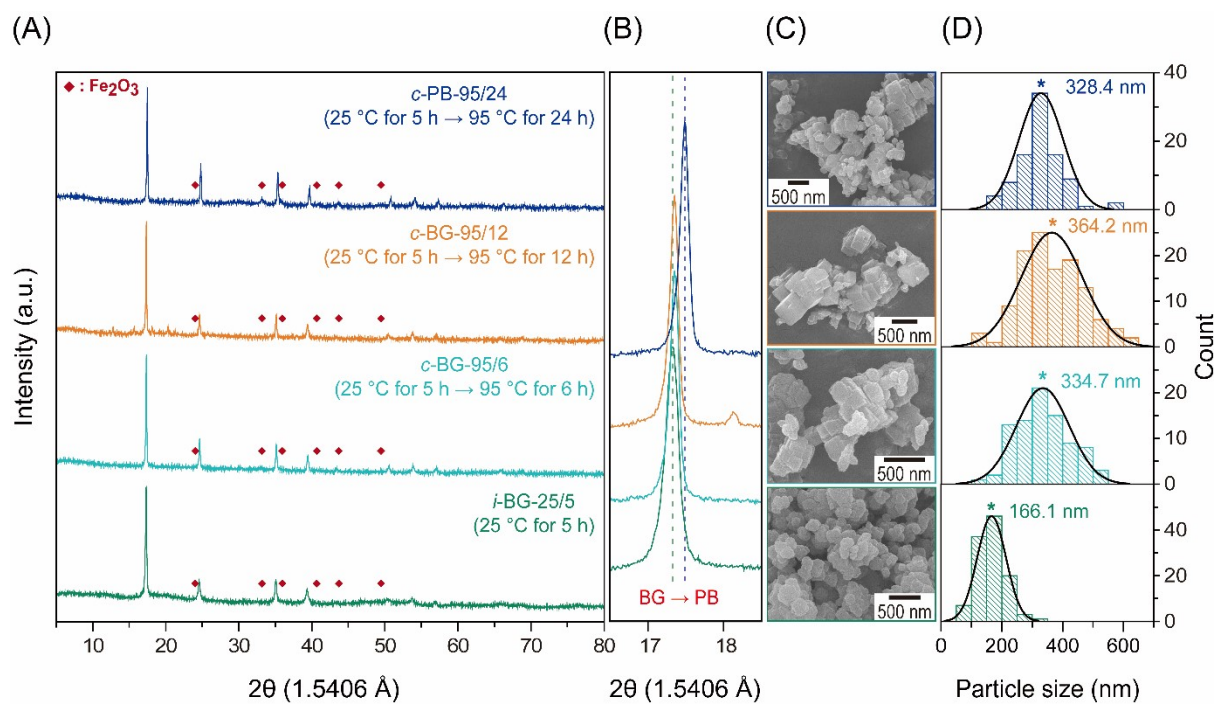

**Fig. S5.** (A) XRD patterns of a series of *c*-PB-95/*t* samples and (B) magnified XRD patterns in the  $2\theta$  range of 16.5°–18.5°. (C) SEM images and (D) particle size distribution curves of a series of *c*-PB-95/*t* samples.

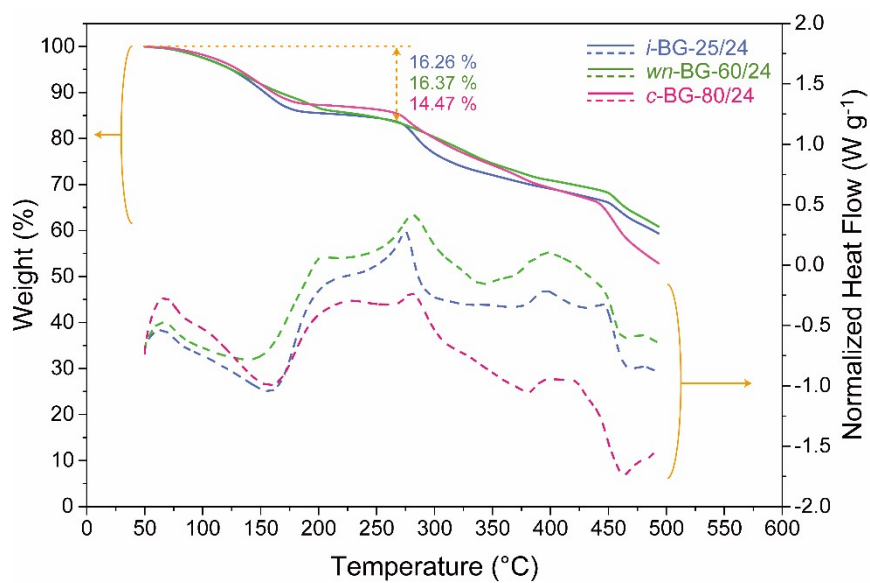

**Fig. S6.** TGA/DSC profiles of *i*-BG-25/24, *wn*-BG-60/24, and *c*-BG-80/24.

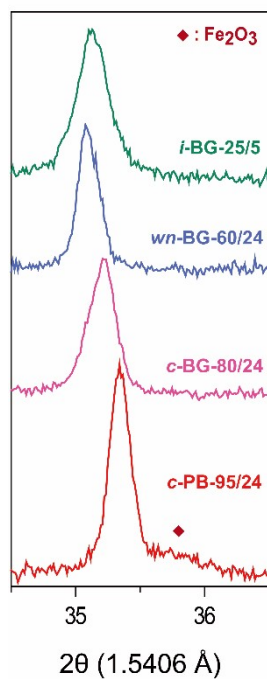

**Fig. S7.** Magnified XRD profiles of Fig. 2A in the  $2\theta$  range of  $34.5^\circ$ – $36.5^\circ$  to display (400) reflections.



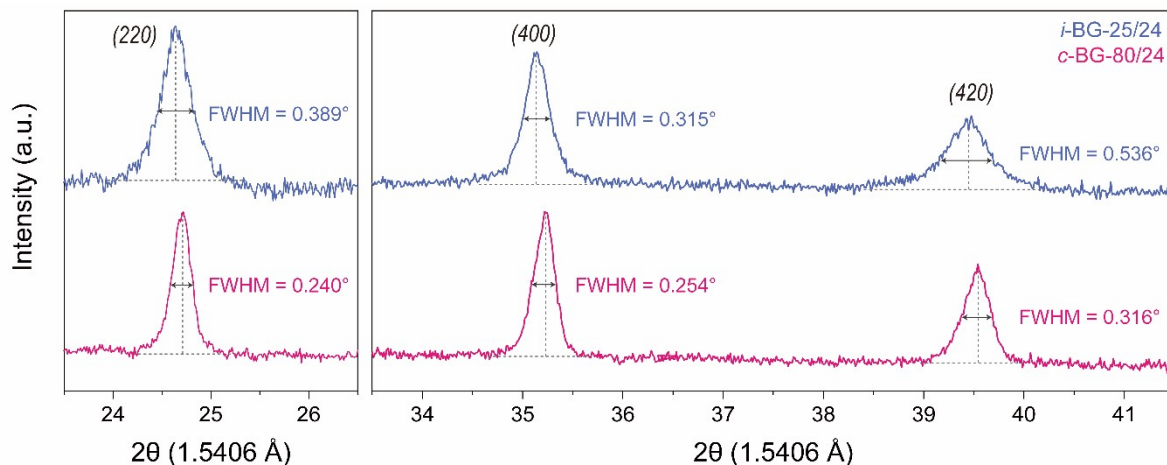

**Fig. S8.** Comparison of XRD patterns between *i*-BG-25/24 and *c*-BG-80/24 in the  $2\theta$  range of  $23.5^\circ$ – $26.5^\circ$  and  $33.5^\circ$ – $41.5^\circ$ , respectively.

*i*-BG-25/24 exhibited a larger full-width-at-half-maximum (FWHM) value of (400) peak ( $0.315^\circ$ ) compared with *c*-BG-80/24 ( $0.254^\circ$ ), indicating the less crystallinity and more flexible framework of *i*-BG-25/24. The initial high capacity originating from the structural flexibility of *i*-BG-25/24 caused increasing stress on the host framework, leading to capacity decay within only a few initial cycles.

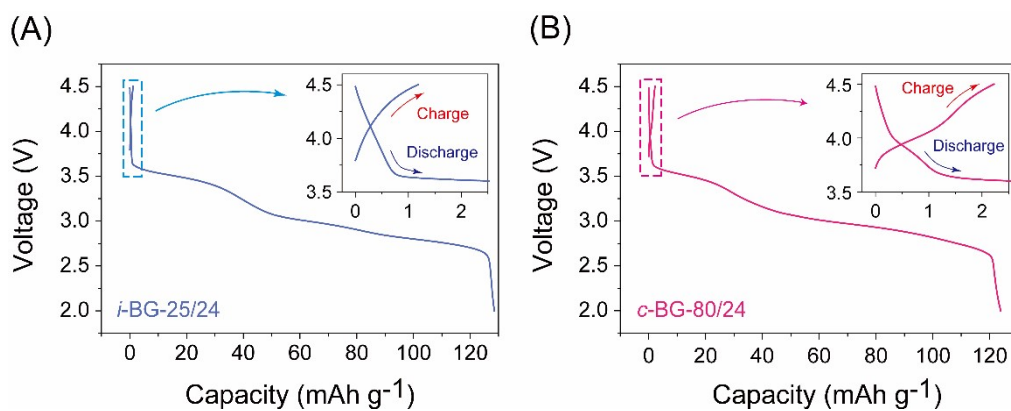

**Fig. S9.** Galvanostatic curves in the first cycle at a current density of 10 mA g<sup>-1</sup>. (A) *i*-BG-25/24. (B) *c*-BG-80/24.

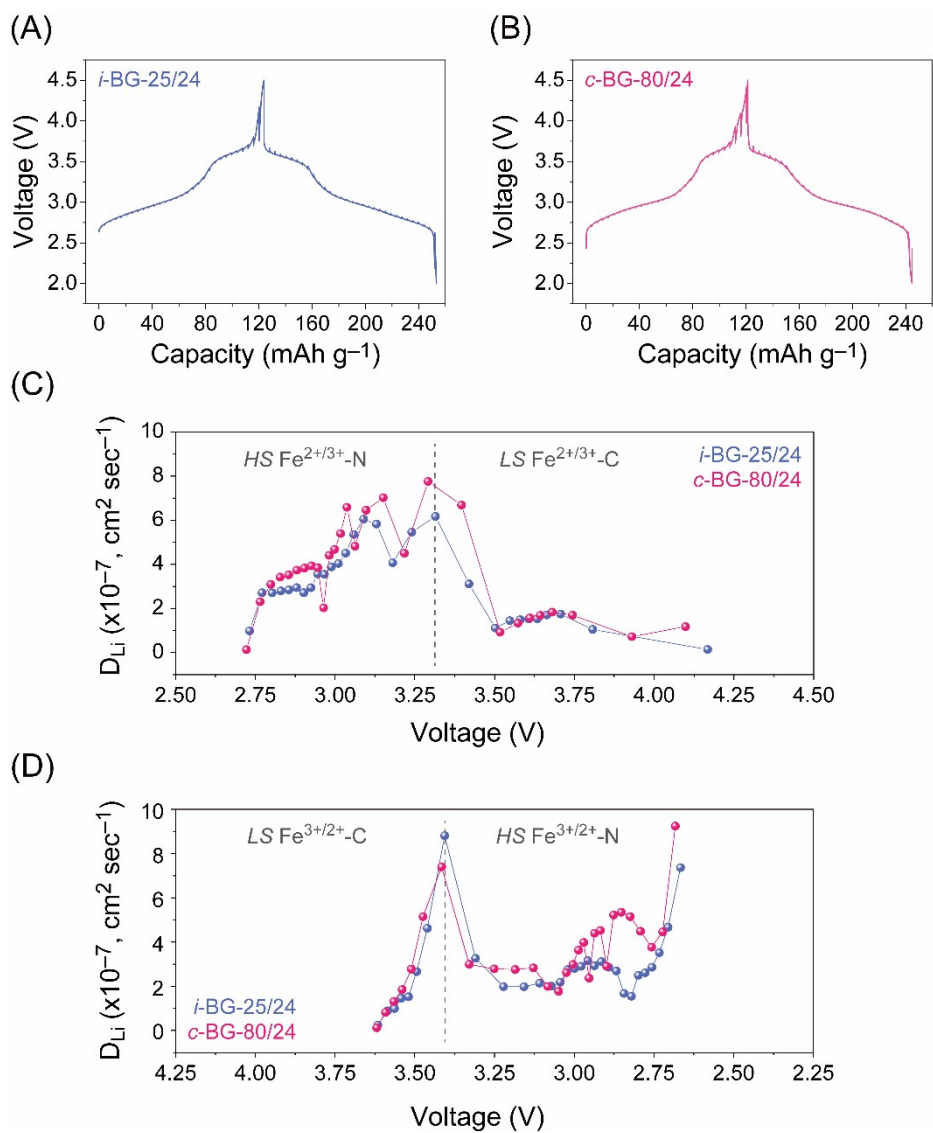

**Fig. S10.** (A–B) GITT curves and (C–D) calculated  $D_{Li}$  during the charge/discharge process.

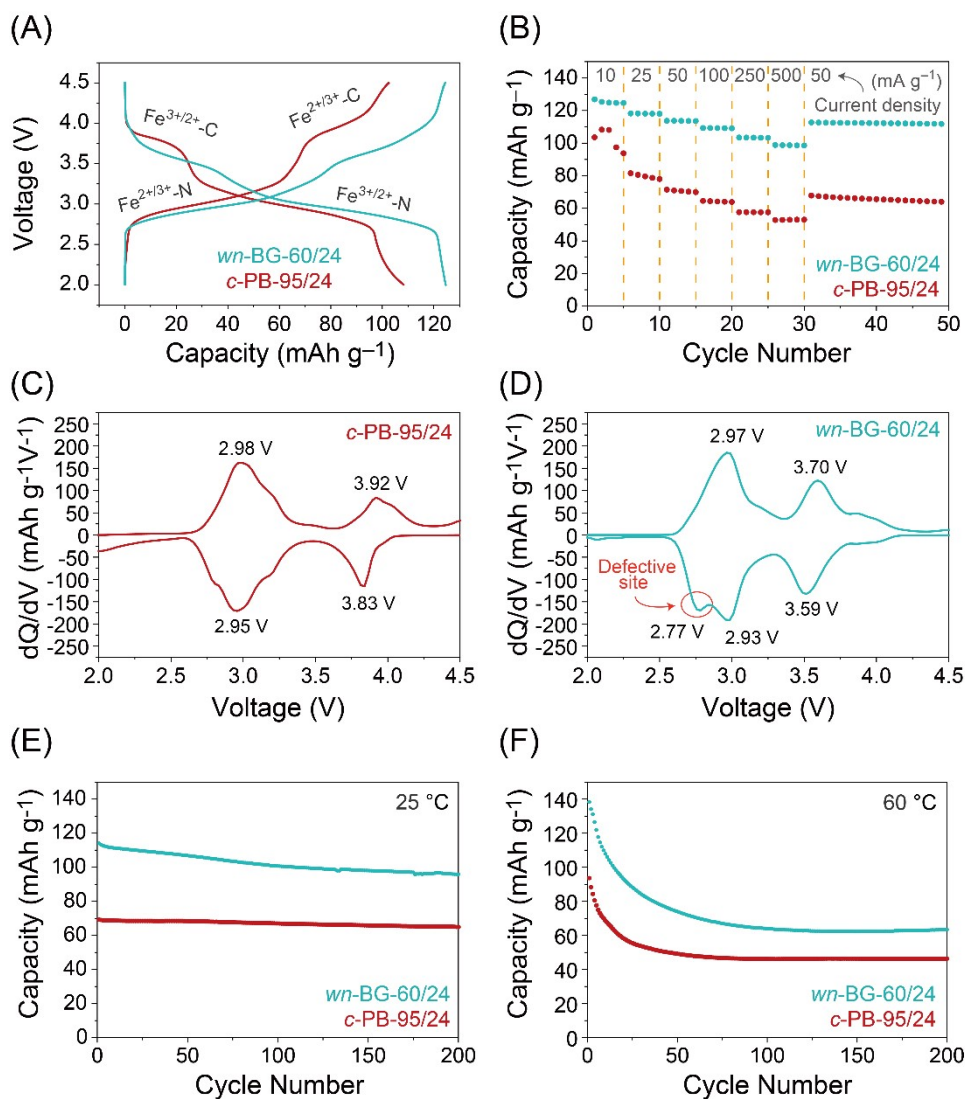

**Fig. S11.** Electrochemical evaluation of *wn*-BG-60/24 and *c*-PB-95/24. (A) Galvanostatic charge/discharge curves at a current density of 10 mA g<sup>-1</sup>. (B) Rate capability measured at current densities of 10, 25, 50, 100, 250, and 500 mA g<sup>-1</sup>. (C and D) Differential capacity (dQ/dV) versus voltage plots for *c*-PB-95/24 and *wn*-BG-60/24. (E and F) Cycling performance (E) at 25 °C and (F) 60 °C with a current density of 100 mA g<sup>-1</sup>.

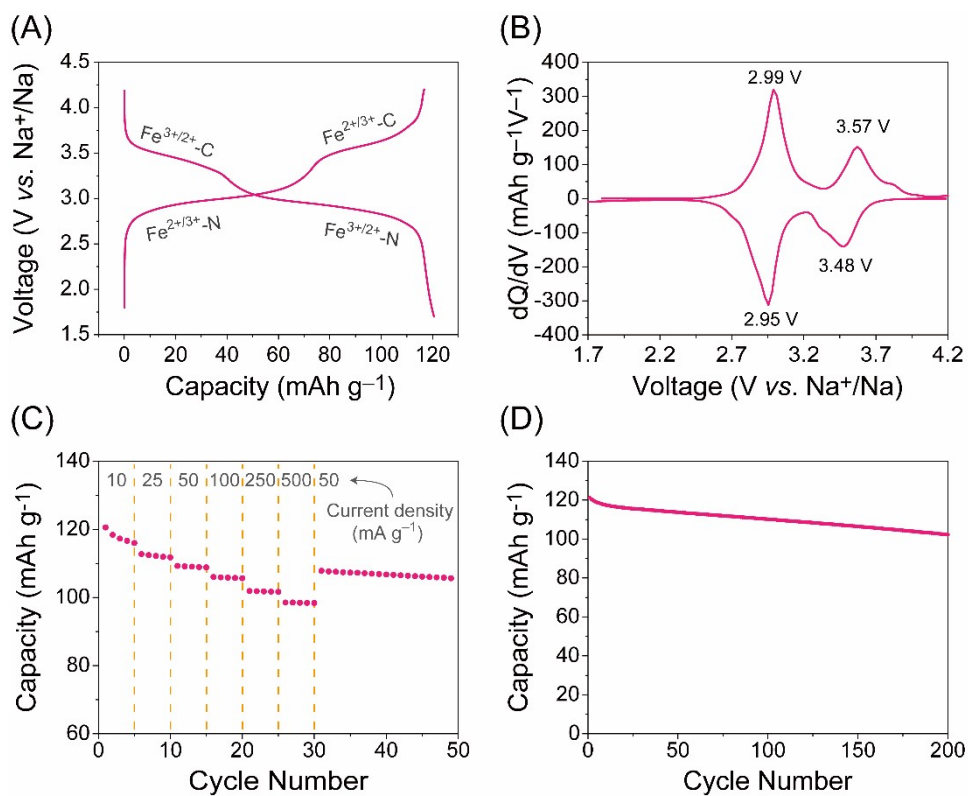

**Fig. S12.** Electrochemical evaluations of *c*-BG-80/24 in the SIB cell. (A) Galvanostatic charge/discharge curves at a current density of 10 mA g<sup>-1</sup>. (B) Differential capacity (dQ/dV) versus voltage plot. (C) Rate capability measured at current densities of 10, 25, 50, 100, 250, and 500 mA g<sup>-1</sup>. (D) Cycling performance at 25 °C.

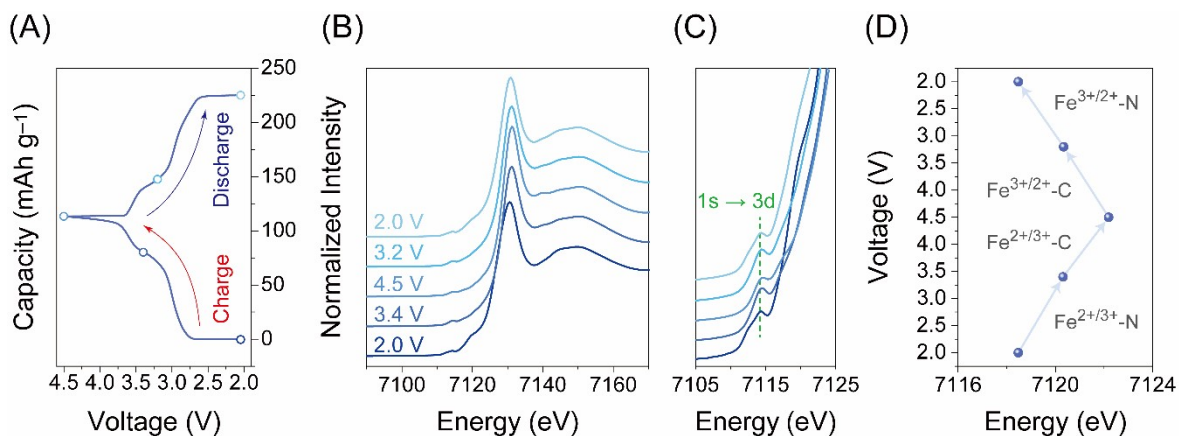

**Fig. S13.** XAFS characterizations for *i*-BG-25/24. (A) Typical galvanostatic charge/discharge curves of *i*-BG-25/24. (B) Normalized XANES spectra achieved at the Fe K-edge for *i*-BG-25/24 samples with different charging states. (C) Magnified XANES profiles showing the pre-edge region. The vertical dotted line in green visualizes the pre-edge peak shift. (D) The edge energy profile of *i*-BG-25/24 as a function of cell voltage along with the corresponding redox couples.

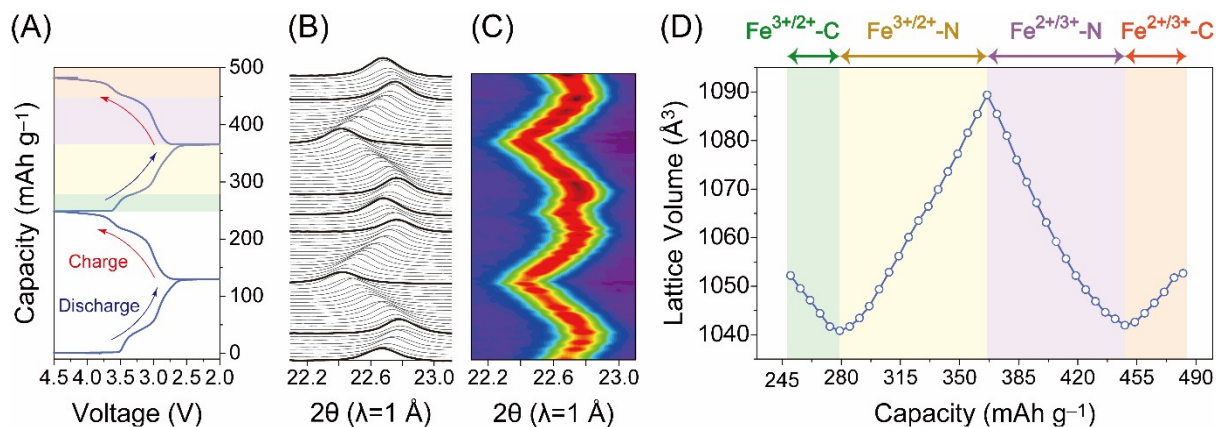

**Fig. S14.** *In situ* synchrotron XRD analyses of *i*-BG-25/24. (A) Galvanostatic charge/discharge profiles of *i*-BG-25/24 measured at 120 mA g<sup>-1</sup> for two cycles during *in situ* XRD measurement. (B) XRD patterns in the 2θ range of 22.1°–23.1° to show the (400) reflection profile and (C) the corresponding contour plot. (D) Calculated lattice volume (Å<sup>3</sup>) during the charge/discharge process in the second cycle.

**Table S1.** Elemental analysis results by ICP-OES.

|                     | ICP-OES    |             |                         | TGA/DSC                                  |
|---------------------|------------|-------------|-------------------------|------------------------------------------|
|                     | K<br>(ppm) | Fe<br>(ppm) | K/Fe ratio<br>(mol/mol) | H <sub>2</sub> O<br>(wt%) <sup>[a]</sup> |
| <i>i</i> -BG-25/24  | 174.762    | 306698.933  | 0.000813881             | 16.26                                    |
| <i>wn</i> -BG-60/24 | 6316.645   | 277718.199  | 0.032486921             | 16.37                                    |
| <i>c</i> -BG-80/24  | 7134.223   | 360993.785  | 0.028227562             | 14.47                                    |

[a] Estimated by measuring the weight loss (%) from 50 °C to 266 °C.



**Table S2.** Comparison of the electrochemical performance of a series of BGs obtained in this study and that presented in previous reports.

|                     | Shape     | Operating voltage                  | Capacity (mAh g <sup>-1</sup> )<br>@ Current density (mA g <sup>-1</sup> ) | Capacity retention (%)<br>@ Cycle number (cycles) | Ref.       |
|---------------------|-----------|------------------------------------|----------------------------------------------------------------------------|---------------------------------------------------|------------|
| <i>i</i> -BG-25/24  | Irregular | 2.0–4.5 V vs. Li/Li <sup>+</sup>   | 126.3 @ 10                                                                 | 77.6 @ 200                                        | This study |
| <i>wn</i> -BG-60/24 | Walnut    | 2.0–4.5 V vs. Li/Li <sup>+</sup>   | 124.6 @ 10                                                                 | 80 @ 200                                          |            |
| <i>c</i> -BG-80/24  | Cubic     | 2.0–4.5 V vs. Li/Li <sup>+</sup>   | 124.3 @ 10                                                                 | 83.6 @ 200                                        |            |
| <i>c</i> -BG-80/24  | Cubic     | 1.7–4.2 V vs. Na/Na <sup>+</sup>   | 120.5 @ 10                                                                 | 84.4 @ 200                                        |            |
| <i>c</i> -PB-95/24  | Cubic     | 2.0–4.5 V vs. Li/Li <sup>+</sup>   | 108.3 @ 10                                                                 | 93.8 @ 200                                        |            |
| Na-MnHCF            | Irregular | 2.0 – 4.2 V vs. Na/Na <sup>+</sup> | 126 @ 30                                                                   | 60 @ 50                                           | [10]       |
| Na-FeHCF            | Cubic     | 2.0 – 4.2 V vs. Na/Na <sup>+</sup> | 128 @ 30                                                                   | 76 @ 50                                           |            |
| Na-CoHCF            | Irregular | 2.0 – 4.2 V vs. Na/Na <sup>+</sup> | 100 @ 30                                                                   | 84 @ 50                                           |            |
| Na-NiHCF            | Irregular | 2.0 – 4.2 V vs. Na/Na <sup>+</sup> | 66 @ 30                                                                    | Almost no capacity loss                           |            |
| Co-PW               | Cubic     | 2.0 – 4.1 V vs. Na/Na <sup>+</sup> | 150 @ 10                                                                   | 89.1 @ 200                                        | [13]       |
| KNiHCF              | Irregular | 2.0 – 4.5 V vs. K/K <sup>+</sup>   | 62.8 @ 100                                                                 | 88.6 @ 100                                        | [14]       |
| Fe-PBA              | Irregular | 2.0 – 4.5 V vs. Li/Li <sup>+</sup> | 115 @ 10                                                                   | 50 @ 100                                          | [21]       |

|                                                  |           |                                          |             |             |      |
|--------------------------------------------------|-----------|------------------------------------------|-------------|-------------|------|
| Co-PBA                                           | Irregular | 2.0 – 4.5<br>V vs. Li/Li <sup>+</sup>    | 32 @ 10     | 96.7 @ 100  |      |
| Ni-PBA                                           | Irregular | 2.0 – 4.5<br>V vs. Li/Li <sup>+</sup>    | 50 @ 10     | 96 @ 100    |      |
| Cu-PBA                                           | Irregular | 2.0 – 4.5<br>V vs. Li/Li <sup>+</sup>    | 41 @ 10     | 112.8 @ 100 |      |
| NiFe-PBA                                         | Irregular | 2.0 – 4.1<br>V vs.<br>Na/Na <sup>+</sup> | 73.8 @ 50   | 85.8 @ 1120 | [23] |
| FeFe(CN) <sub>6</sub>                            | Irregular | 2.0 – 4.0<br>V vs.<br>Na/Na <sup>+</sup> | 109 @ 60    | 87 @ 500    | [30] |
| CoHCF-B<br>(1M Na <sub>2</sub> SO <sub>4</sub> ) | Cubic     | 0.0 – 1.0<br>V vs. SCE                   | 110.8 @ 240 | 20.8 @ 2000 | [33] |
| CoHCF-R<br>(1M Na <sub>2</sub> SO <sub>4</sub> ) | Cubic     | 0.0 – 1.0<br>V vs. SCE                   | 115 @ 240   | 69.2 @ 2000 |      |
| Cu-PBA<br>(1M Li(NO <sub>3</sub> ))              | N/A       | 0.0 – 1.2<br>V vs. SHE                   | 51.36 @ 300 | 62 @ 50     | [61] |
| Cu-PBA<br>(1M Na(NO <sub>3</sub> ))              |           |                                          | 56.80 @ 300 | 92 @ 50     |      |
| Cu-PBA<br>(1M K(NO <sub>3</sub> ))               |           |                                          | 55.15 @ 300 | 97 @ 50     |      |
| Cu-PBA<br>(1M Rb(NO <sub>3</sub> ))              |           |                                          | 41.44 @ 300 | 95.5 @ 50   |      |
| Cu-PBA<br>(1M Cs(NO <sub>3</sub> ))              |           |                                          | 28.30 @ 300 | 87 @ 50     |      |
